# Supplementary material
Source: publisher figshare collection journal article supplement (https://plos.figshare.com/articles/dataset/_/7023968)
Supplement: Supplementary file 1 [file 1]

Archive with 6 entries (6 files):
- pone.0202223.s001.pdf
- pone.0202223.s002.pdf
- pone.0202223.s003.pdf
- pone.0202223.s004.pdf
- pone.0202223.s005.pdf
- pone.0202223.s006.pdf
