# Supplementary material
Source: publisher figshare collection journal article supplement (https://plos.figshare.com/articles/dataset/_/7023968)
Supplement: Supplementary file 1 [file 1 › pone.0202223.s002.pdf]

# Automatically assembling a full census of an academic field

Allison C. Morgan<sup>1\*</sup>, Samuel F. Way<sup>1</sup>, Aaron Clauset<sup>1,2,3</sup>

**1** Department of Computer Science, University of Colorado, Boulder, CO, USA

**2** BioFrontiers Institute, University of Colorado, Boulder, CO, USA

**3** Santa Fe Institute, Santa Fe, NM, USA

\* allison.morgan@colorado.edu

## Supporting information

**S1 Appendix. Keyword list for navigating to a faculty directory.**

["professor", "faculty", "tenure", "people", "full-time", "directory", "personnel",  
"professeur", "professeure", "staff"]
