# Supplementary material
Source: publisher figshare collection journal article supplement (https://plos.figshare.com/articles/dataset/_/7023968)
Supplement: Supplementary file 1 [file 1 › pone.0202223.s004.pdf]

# Automatically assembling a full census of an academic field

Allison C. Morgan<sup>1\*</sup>, Samuel F. Way<sup>1</sup>, Aaron Clauset<sup>1,2,3</sup>

**1** Department of Computer Science, University of Colorado, Boulder, CO, USA

**2** BioFrontiers Institute, University of Colorado, Boulder, CO, USA

**3** Santa Fe Institute, Santa Fe, NM, USA

\* allison.morgan@colorado.edu

## Supporting information

**S3 Appendix. Collection of first and last names.** The list of 7,058 first and last names can be found at [https://github.com/allisonmorgan/academic\\_census](https://github.com/allisonmorgan/academic_census).
