# Supplementary material
Source: publisher figshare collection journal article supplement (https://plos.figshare.com/articles/dataset/_/7023968)
Supplement: Supplementary file 1 [file 1 › pone.0202223.s005.pdf]

# Automatically assembling a full census of an academic field

Allison C. Morgan<sup>1\*</sup>, Samuel F. Way<sup>1</sup>, Aaron Clauset<sup>1,2,3</sup>

**1** Department of Computer Science, University of Colorado, Boulder, CO, USA

**2** BioFrontiers Institute, University of Colorado, Boulder, CO, USA

**3** Santa Fe Institute, Santa Fe, NM, USA

\* allison.morgan@colorado.edu

## Supporting information

**S4 Appendix. Keywords in TTT and non-TTT titles.** [“professor”, “faculty”, “tenure”, “people”, “full-time”, “assistant”, “associate”, “director”, “chair”, “president”, “asst.”, “prof.”, “assoc.”, “personnel”, “professeure”, “professeur”, “research”, “visiting”, “practice”, “adjunct”, “secretary”, “admin”, “lecturer”, “emerit”, “affiliat”, “industry”, “part-time”, “instructor”, “specialist”, “advisor”, “manager”, “retire”, “courtesy”, “technical”, “post-doc”, “postdoc”, “staff”, “guest”, “collab”, “coordinat”, “develop”, “support”, “chancellor”, “scholar”, “engineer”, “joint”, “in residence”, “dir.”, “dean”, “programmer”, “analyst”, “technician”, “designer”, “co-chair”, “secondary appointment”, “teaching”, “provost”, “head”, “scientist”, “lead”, “directeur”, “phd student”, “graduate”, “fellow”]
