# Supplementary material
Source: publisher figshare collection journal article supplement (https://plos.figshare.com/articles/dataset/_/7023968)
Supplement: Supplementary file 1 [file 1 › pone.0202223.s006.pdf]

# Automatically assembling a full census of an academic field

Allison C. Morgan<sup>1\*</sup>, Samuel F. Way<sup>1</sup>, Aaron Clauset<sup>1,2,3</sup>

**1** Department of Computer Science, University of Colorado, Boulder, CO, USA

**2** BioFrontiers Institute, University of Colorado, Boulder, CO, USA

**3** Santa Fe Institute, Santa Fe, NM, USA

\* allison.morgan@colorado.edu

## Supporting information

### **S5 Appendix. Keywords which should not be contained in TTT titles.**

["adjoint", "techincal", "business advisor", "academic advisor", "tutoring", "manager", "admin", "specialist", "support", "staff", "programmer", "guest", "developer", "finan", "scientist", "researcher", "intern ", "lecturer", "analyst", "instruct", "post", "technici", "technical", "part-time", "part time", " of practice", " of the practice", "research professor", "office assistant", "research associate", "marketing", "research assistant", "teaching", "affiliate", "acting faculty", "specilaist", "outreach", "clinical", "partnerships", "recruitment", "communications", "media relations", "collaborator", "visiting", "practice", "adj ", "senior fellow", "research fellow", "avionics", "commercialization", "comm ", "project director", "adjt", "research engineer", "it director", "lab director", "managing director", "student success", "status-only", "librarian", "visitng", "secondary faculty", "lecturer", "emeritus", "hourly", "assistant to the ", "adjunct faculty", "pullman bremerton everett adjunct", "adjunct and courtesy", "joint / courtesy faculty", "courtesy appointment", "secondary appointment", "assistant adjunct professor", "secretary", "retired", "emerita", "in residence", "program assistant", "industry", "emeriti", "doctoral fellow"]
